# Supplementary material for: A retrospective study of surgical treatment and outcome among women with adnexal torsion in eastern Taiwan from 2010 to 2015
Source: PeerJ. 2018 Dec 4;6:e5995. doi: 10.7717/peerj.5995 (PMC6284449; doi:10.7717/peerj.5995)
Supplement: Supplemental Information 1 [file peerj-06-5995-s001.xlsx]

## Sheet: Sheet1
Age	Pregnancy	Duration_sx	Peritoneal	Abd_pain	Nausea	LUTS	Fever	WBC	Sx_ED_time	Ad_Op_time	Gyn_Op_time	Op_type	Blood_loss	Tumor_size	Op_time	Detorsion	Detorsion_drainage	Detorsion_cystectomy	fixation	Oophorectomy	Simple_cyst	Teratoma	Endometrioma	Fibroma	Necrosis	Hospital_stay	Complex_cyst	Diarrhea
47	0	16	0	1	0	0	0	1	16	4	5	1	50	8	40	0	0	0	0	1	0	0	1	0	0	5	0	#NULL!
40	0	7.5	0	1	0	0	0	0	7.5	1	1	0	50	11	65	0	0	0	0	1	1	0	0	0	0	4	0	0
28	0	6	0	1	0	0	0	0	6	11.5	11	1	350	6.2	200	0	0	1	0	0	0	0	0	0	0	4	1	1
23	0	6	0	1	1	0	0	0	6	1	1	1	50	7.9	54	0	0	1	0	0	0	0	0	0	0	7	1	0
45	0	12	0	1	1	0	0	1	12	11	11	0	100	13.3	80	0	0	0	0	1	0	1	0	0	0	6	0	0
40	0	12	0	1	0	0	0	0	12	1	1	1	50	4.2	60	0	0	0	0	1	0	0	0	0	0	8	1	1
31	1	5	0	1	0	0	0	0	5	1	1	1	50	9	50	0	1	0	0	0	1	0	0	0	0	3	0	0
29	1	4	0	1	0	0	0	0	4	1.5	1.5	1	400	7.4	125	0	0	1	0	0	1	0	0	0	0	3	0	0
23	0	0	0	1	0	0	0	0	0	1	1	1	50	4.3	40	0	0	0	0	1	1	0	0	0	0	4	0	0
47	0	30	0	1	0	0	0	0	33	2	2	1	200	5.9	180	0	0	0	0	1	0	1	0	0	0	3	0	0
19	0	15	0	1	1	0	0	0	15	1	4	1	500	7	90	0	0	1	0	0	1	0	0	0	0	3	0	0
49	0	48	0	1	0	0	0	0	24	2.5	5.5	0	50	7	45	0	0	0	0	1	1	0	0	0	0	5	0	0
40	0	72	0	1	0	0	0	0	12	1	1	0	400	10	168	0	0	0	0	1	0	0	0	1	0	6	0	0
27	0	2	0	1	0	0	0	0	2	1	1	1	500	9	120	0	0	0	0	1	0	0	1	0	0	5	0	0
18	0	30	0	1	0	0	0	0	33	1	1	0	50	11	70	0	0	0	1	0	0	1	0	0	0	4	0	0
60	0	24	0	1	0	0	0	0	24	2	2	1	50	9.2	30	0	0	0	0	1	1	0	0	0	0	5	0	0
65	0	3	0	1	0	0	0	0	3	7	7	0	50	12	60	0	0	0	0	1	0	0	0	1	0	5	0	0
76	0	3	0	1	1	0	0	0	3	10	10	1	50	9.2	130	0	0	0	0	1	0	0	0	0	1	2	0	0
82	0	34	1	0	0	0	0	0	34	1	1	0	50	13	87	0	0	0	0	1	0	0	0	1	0	6	0	0
53	0	24	0	1	0	0	0	0	24	2	2	1	50	8.48	190	0	0	0	0	1	0	0	1	0	0	3	0	0
46	0	10	0	1	0	0	0	0	10	2	2	1	50	6	29	0	0	0	0	1	1	0	0	0	0	5	0	0
45	0	14	0	1	0	0	0	0	14	8	1	0	100	7.97	60	0	0	1	0	0	0	0	1	0	0	3	0	0
45	0	4	0	1	0	0	0	0	4	1	1	1	50	5.5	60	0	0	0	0	1	0	1	0	0	0	5	0	0
41	0	8	0	1	0	0	0	0	8	10	10	1	100	5	90	0	0	0	0	1	1	0	0	0	0	2	0	0
31	0	72	0	1	0	0	0	0	36	3	3	1	50	5.7	38	0	0	1	0	0	1	0	0	0	0	2	0	0
32	0	12	0	1	0	0	0	0	12	2	2	1	50	9.1	59	0	0	0	0	1	0	1	0	0	0	2	0	0
27	0	24	0	1	1	0	0	1	24	4	4.5	1	50	5.31	120	0	0	1	0	0	1	0	0	0	0	5	0	0
27	0	48	0	1	0	0	0	0	48	1	1	0	100	8.6	70	0	0	0	0	1	1	0	0	0	0	5	0	0
26	0	48	0	1	0	0	0	1	48	3	3	0	50	9.3	65	0	0	0	0	1	0	1	0	0	0	9	0	0
16	0	24	0	1	0	0	0	0	24	6	6	1	50	4.7	60	0	0	0	0	0	1	0	0	0	0	5	0	0
13	0	8	0	1	0	0	0	1	8	1	1	1	50	8.5	98	0	0	0	0	1	0	1	0	0	0	4	0	0
16	0	25	1	0	0	0	0	1	25	1	3.5	1	50	7.5	64	0	0	0	0	1	1	0	0	0	0	4	0	0
17	1	2.5	0	1	1	0	0	0	2.5	1.5	2	1	50	5.3	53	0	0	1	0	0	0	1	0	0	0	5	0	0
12	0	24	0	1	0	0	0	0	24	1	2	0	50	8.1	60	0	0	0	0	1	0	0	0	0	0	4	1	0
13	0	96	0	1	1	0	0	0	96	1	2	0	50	12	55	0	0	1	0	0	0	1	0	0	0	6	0	0
35	0	20	0	1	0	0	0	0	12	1	2	1	50	6.2	180	0	0	1	0	0	0	1	0	0	0	3	0	0
65	0	75	0	1	1	0	1	0	12	1.5	2.5	0	350	8.8	90	0	0	0	0	1	0	0	0	1	0	6	0	0
48	0	24	0	1	0	0	0	0	24	4	4	0	300	7.5	90	0	0	0	0	1	1	0	0	0	0	6	0	0
41	0	16	0	1	0	0	0	0	16	1	2	0	300	17	146	0	0	0	0	1	0	0	0	0	0	6	1	0
42	0	30	0	1	0	0	0	0	12	1	2	1	200	8.5	120	0	0	0	0	1	0	0	1	0	0	5	0	0
21	0	1	0	1	0	0	0	0	1	1	2	1	50	4.6	30	0	0	1	0	0	1	0	0	0	0	4	0	0
24	0	72	0	1	0	1	0	0	12	1	2	1	50	10.6	110	0	0	1	0	0	1	0	0	0	0	4	0	0
